# Supplementary material for: Case fatality ratios for serious emergency conditions in the Republic of Ireland: a longitudinal investigation of trends over the period 2002–2014 using joinpoint analysis
Source: PubMed Central journal article supplement (PMC6006987; doi:10.1186/s12913-018-3260-1), 2018-06-19
Supplement: 12913_2018_3260_MOESM4_ESM.pdf [file 12913_2018_3260_MOESM4_ESM.pdf]

**Additional file 4: Table 4** Events (deaths + emergency admissions discharged alive after a minimum 2 day length of stay) for emergency conditions used in the indicator analysis by year (\*excluding Roscommon)

| Condition                                      | 2002                         | 2003                         | 2004                         | 2005                         | 2006                         | 2007                         | 2008                         | 2009                         | 2010                         | 2011*                        | 2012*                        | 2013                         | 2014                         | Total (Col%)                   |
|------------------------------------------------|------------------------------|------------------------------|------------------------------|------------------------------|------------------------------|------------------------------|------------------------------|------------------------------|------------------------------|------------------------------|------------------------------|------------------------------|------------------------------|--------------------------------|
| <b>Stroke</b>                                  |                              |                              |                              |                              |                              |                              |                              |                              |                              |                              |                              |                              |                              |                                |
| Stroke                                         | 5861                         | 5768                         | 5595                         | 5281                         | 5342                         | 5405                         | 5465                         | 5648                         | 5786                         | 5526                         | 5535                         | 5612                         | 5727                         | <b>72551</b><br><b>14.74%</b>  |
| <b>AMI and CA</b>                              |                              |                              |                              |                              |                              |                              |                              |                              |                              |                              |                              |                              |                              |                                |
| Acute Myocardial Infarction and Cardiac Arrest | 7738                         | 7177                         | 7297                         | 7194                         | 7295                         | 7130                         | 6950                         | 6690                         | 6494                         | 6234                         | 6391                         | 6319                         | 6081                         | <b>88990</b><br><b>18.08%</b>  |
| <b>Other SECs</b>                              |                              |                              |                              |                              |                              |                              |                              |                              |                              |                              |                              |                              |                              |                                |
| Acute Heart Failure                            | 5028                         | 4695                         | 4546                         | 4381                         | 4401                         | 4366                         | 4211                         | 4274                         | 4327                         | 3955                         | 4116                         | 4294                         | 4253                         | <b>56847</b><br><b>11.55%</b>  |
| Anaphylaxis                                    | 48                           | 36                           | 30                           | 41                           | 32                           | 25                           | 34                           | 30                           | 34                           | 21                           | 36                           | 32                           | 35                           | <b>434</b><br><b>0.09%</b>     |
| Asphyxiation                                   | 271                          | 300                          | 313                          | 357                          | 360                          | 335                          | 390                          | 442                          | 422                          | 461                          | 457                          | 404                          | 418                          | <b>4930</b><br><b>14.74%</b>   |
| Asthma                                         | 2580                         | 2771                         | 2570                         | 2512                         | 2425                         | 2104                         | 2086                         | 1834                         | 1775                         | 1632                         | 1861                         | 1597                         | 1789                         | <b>27536</b><br><b>5.60%</b>   |
| Falls <75                                      | 6266                         | 6186                         | 6187                         | 5858                         | 6282                         | 6552                         | 6318                         | 6168                         | 6779                         | 5403                         | 5292                         | 5340                         | 5352                         | <b>77983</b><br><b>15.85%</b>  |
| Fractured Neck of Femur                        | 3674                         | 3796                         | 3742                         | 3702                         | 3827                         | 3694                         | 3837                         | 3781                         | 3895                         | 3630                         | 3554                         | 3750                         | 3940                         | <b>48795</b><br><b>9.91%</b>   |
| Meningitis                                     | 350                          | 365                          | 322                          | 314                          | 344                          | 294                          | 283                          | 287                          | 225                          | 215                          | 191                          | 233                          | 196                          | <b>3619</b><br><b>0.74%</b>    |
| Pregnancy and Birth Related                    | 54                           | 57                           | 29                           | 54                           | 82                           | 52                           | 75                           | 73                           | 60                           | 37                           | 11                           | 4                            | 3                            | <b>591</b><br><b>0.12%</b>     |
| Road Traffic Accident NECs                     | 2993                         | 2676                         | 2673                         | 2269                         | 2235                         | 2226                         | 2029                         | 1779                         | 1573                         | 1378                         | 1317                         | 1295                         | 1392                         | <b>25835</b><br><b>5.25%</b>   |
| Ruptured Aortic Aneurysm                       | 283                          | 318                          | 270                          | 294                          | 311                          | 327                          | 299                          | 294                          | 316                          | 286                          | 308                          | 338                          | 286                          | <b>3930</b><br><b>0.80%</b>    |
| Self-Harm                                      | 1906                         | 1845                         | 1654                         | 1632                         | 1630                         | 1703                         | 1706                         | 1556                         | 1551                         | 1421                         | 1466                         | 1382                         | 1393                         | <b>20845</b><br><b>4.24%</b>   |
| Septic Shock                                   | 753                          | 751                          | 787                          | 816                          | 869                          | 972                          | 1036                         | 1108                         | 1207                         | 1163                         | 1449                         | 1598                         | 1956                         | <b>14465</b><br><b>2.94%</b>   |
| Serious Head Injury                            | 3840                         | 3701                         | 3818                         | 3878                         | 3646                         | 3778                         | 3472                         | 3609                         | 3350                         | 3106                         | 2874                         | 2814                         | 2915                         | <b>44801</b><br><b>9.10%</b>   |
| <b>Other: Subtotal</b>                         | <b>28046</b>                 | <b>27470</b>                 | <b>26941</b>                 | <b>26108</b>                 | <b>26444</b>                 | <b>26428</b>                 | <b>25776</b>                 | <b>25235</b>                 | <b>25514</b>                 | <b>22708</b>                 | <b>22932</b>                 | <b>23081</b>                 | <b>23928</b>                 | <b>330611</b><br><b>67.18%</b> |
| <b>Total</b>                                   | <b>41645</b><br><b>8.46%</b> | <b>40415</b><br><b>8.21%</b> | <b>39833</b><br><b>8.09%</b> | <b>38583</b><br><b>7.84%</b> | <b>39081</b><br><b>7.94%</b> | <b>38963</b><br><b>7.92%</b> | <b>38191</b><br><b>7.76%</b> | <b>37573</b><br><b>7.63%</b> | <b>37794</b><br><b>7.68%</b> | <b>34468</b><br><b>7.00%</b> | <b>34858</b><br><b>7.08%</b> | <b>35012</b><br><b>7.11%</b> | <b>35736</b><br><b>7.26%</b> | <b>492152</b><br><b>100%</b>   |
