# Supplementary material for: Case fatality ratios for serious emergency conditions in the Republic of Ireland: a longitudinal investigation of trends over the period 2002–2014 using joinpoint analysis
Source: Springer Nature journal article supplement (doi:10.1186/s12913-018-3260-1), 2018-06-19
Supplement: MOESM2 [file 15857386]

**Additional file 2: Table 2** Basket of Emergency Conditions by ICD-9 and ICD-10

| <b>Emergency Conditions</b> |                                                              |                                                                                                   |
|-----------------------------|--------------------------------------------------------------|---------------------------------------------------------------------------------------------------|
|                             | <b>ICD-9</b>                                                 | <b>ICD-10</b>                                                                                     |
|                             | <b>HIPE (2002-2004)/ CSO (2002-2006)</b>                     | <b>HIPE (2005-2012)/CSO (2007-2012)</b>                                                           |
| <b>STROKE</b>               |                                                              |                                                                                                   |
| Stroke                      | 432.9; 431; 433; 434; 436                                    | I61; I63; I64; I62.9                                                                              |
| <b>AMI and CA</b>           |                                                              |                                                                                                   |
| Acute Myocardial Infarction | 410                                                          | I21; I22; I23                                                                                     |
| Cardiac Arrest              | 427.5                                                        | I46; I46.9                                                                                        |
| <b>OTHER</b>                |                                                              |                                                                                                   |
| Acute Heart Failure         | 428                                                          | I50                                                                                               |
| Anaphylaxis                 | 995.0; 995.6                                                 | T78.0; T78.2; T80.5; T88.6                                                                        |
| Asphyxiation                | 799.0; 994.7                                                 | R09.0; T71                                                                                        |
| Asthma                      | 493.0; 493.1; 493.8; 493.9                                   | J45; J46                                                                                          |
| Falls under 75              | E880 –E888                                                   | W00 - W19                                                                                         |
| Fractured Neck of Femur     | 820; 821                                                     | S72                                                                                               |
| Meningitis                  | 320- 322; 036; 027                                           | G00 - G03; A32; A39                                                                               |
| Pregnancy                   | 630 – 679                                                    | O00 - O99                                                                                         |
| Road Traffic Accident       | E800 - E807; E810- E829                                      | V0-V7; V80.2-V80.5; V82.1; V83.0-V83.3; V84.0–V84.3; V85.0–V85.3; V86.0–V86.3; V87.0–V87.8; V89.2 |
| Ruptured Aortic Aneurysm    | 441.0; 441.1; 441.3; 441.5; 441.6                            | I71.0; I71.1; I71.3; I71.5; I71.8                                                                 |
| Self-Harm                   | E950-E959                                                    | X6- X84                                                                                           |
| Septic Shock                | 038                                                          | A40; A41                                                                                          |
| Serious Head Injury         | 800-804; 830; 850-854; 870- 874; 900; 925; 940-941; 950- 951 | S02-S09                                                                                           |
