# Supplementary material for: Case fatality ratios for serious emergency conditions in the Republic of Ireland: a longitudinal investigation of trends over the period 2002–2014 using joinpoint analysis
Source: Springer Nature journal article supplement (doi:10.1186/s12913-018-3260-1), 2018-06-19
Supplement: MOESM3 [file 15857386]

**Additional File 3: Table 3** Deaths from emergency conditions used in the indicator analysis by year (\*excluding Roscommon)

| Condition                                      | 2002                        | 2003                        | 2004                        | 2005                        | 2006                        | 2007                        | 2008                        | 2009                        | 2010                        | 2011*                       | 2012*                       | 2013                        | 2014                        | Total (Col%)                  |
|------------------------------------------------|-----------------------------|-----------------------------|-----------------------------|-----------------------------|-----------------------------|-----------------------------|-----------------------------|-----------------------------|-----------------------------|-----------------------------|-----------------------------|-----------------------------|-----------------------------|-------------------------------|
| <b>Stroke</b>                                  |                             |                             |                             |                             |                             |                             |                             |                             |                             |                             |                             |                             |                             |                               |
| Stroke                                         | 1967                        | 1808                        | 1625                        | 1535                        | 1449                        | 1528                        | 1500                        | 1480                        | 1599                        | 1491                        | 1478                        | 1534                        | 1489                        | <b>20483</b><br><b>25.28%</b> |
| <b>AMI and CA</b>                              |                             |                             |                             |                             |                             |                             |                             |                             |                             |                             |                             |                             |                             |                               |
| Acute Myocardial Infarction and Cardiac Arrest | 3686                        | 3242                        | 3195                        | 2938                        | 2976                        | 2762                        | 2660                        | 2458                        | 2369                        | 2086                        | 2234                        | 2122                        | 1867                        | <b>34595</b><br><b>42.70%</b> |
| <b>Other</b>                                   |                             |                             |                             |                             |                             |                             |                             |                             |                             |                             |                             |                             |                             |                               |
| Acute Heart Failure                            | 698                         | 660                         | 606                         | 536                         | 556                         | 511                         | 496                         | 438                         | 558                         | 484                         | 491                         | 555                         | 495                         | <b>7084</b><br><b>8.74%</b>   |
| Anaphylaxis                                    | -                           | -                           | 1                           | -                           | -                           | 2                           | -                           | 1                           | 1                           | -                           | -                           | 1                           | -                           | <b>6</b><br><b>0.01%</b>      |
| Asphyxiation                                   | 253                         | 281                         | 305                         | 325                         | 334                         | 315                         | 365                         | 405                         | 386                         | 426                         | 423                         | 373                         | 379                         | <b>4570</b><br><b>5.64%</b>   |
| Asthma                                         | 70                          | 64                          | 76                          | 62                          | 52                          | 61                          | 52                          | 53                          | 44                          | 53                          | 39                          | 48                          | 40                          | <b>714</b><br><b>0.88%</b>    |
| Falls <75                                      | 30                          | 29                          | 29                          | 37                          | 37                          | 34                          | 26                          | 31                          | 33                          | 36                          | 27                          | 18                          | 25                          | <b>392</b><br><b>0.48%</b>    |
| Fractured Neck of Femur                        | 167                         | 172                         | 139                         | 154                         | 134                         | 111                         | 104                         | 87                          | 87                          | 107                         | 96                          | 90                          | 129                         | <b>1577</b><br><b>1.95%</b>   |
| Meningitis                                     | 23                          | 26                          | 13                          | 22                          | 13                          | 18                          | 20                          | 12                          | 12                          | 8                           | 12                          | 9                           | 7                           | <b>195</b><br><b>0.24%</b>    |
| Pregnancy and Birth Related                    | 5                           | -                           | 1                           | 1                           | 1                           | 2                           | 3                           | 3                           | 1                           | 2                           | 2                           | 3                           | 1                           | <b>25</b><br><b>0.03%</b>     |
| Road Traffic Accident NECs                     | 249                         | 214                         | 211                         | 214                         | 214                         | 181                         | 139                         | 114                         | 103                         | 95                          | 88                          | 85                          | 93                          | <b>2000</b><br><b>2.47%</b>   |
| Ruptured Aortic Aneurysm                       | 235                         | 243                         | 200                         | 224                         | 243                         | 254                         | 228                         | 215                         | 225                         | 221                         | 221                         | 238                         | 187                         | <b>2934</b><br><b>3.62%</b>   |
| Self-Harm                                      | 214                         | 205                         | 174                         | 174                         | 130                         | 156                         | 144                         | 158                         | 127                         | 137                         | 124                         | 128                         | 125                         | <b>1996</b><br><b>2.46%</b>   |
| Septic Shock                                   | 57                          | 40                          | 38                          | 50                          | 44                          | 85                          | 67                          | 78                          | 100                         | 98                          | 81                          | 91                          | 141                         | <b>970</b><br><b>1.20%</b>    |
| Serious Head Injury                            | 324                         | 288                         | 287                         | 322                         | 271                         | 269                         | 269                         | 255                         | 247                         | 255                         | 227                         | 233                         | 227                         | <b>3474</b><br><b>4.29%</b>   |
| <b>Other: Subtotal</b>                         | <b>2325</b>                 | <b>2222</b>                 | <b>2080</b>                 | <b>2121</b>                 | <b>2029</b>                 | <b>1999</b>                 | <b>1913</b>                 | <b>1850</b>                 | <b>1924</b>                 | <b>1922</b>                 | <b>1831</b>                 | <b>1872</b>                 | <b>1849</b>                 | <b>25937</b><br><b>32.02%</b> |
|                                                |                             |                             |                             |                             |                             |                             |                             |                             |                             |                             |                             |                             |                             |                               |
| <b>Total</b>                                   | <b>7978</b><br><b>9.85%</b> | <b>7272</b><br><b>8.98%</b> | <b>6900</b><br><b>8.52%</b> | <b>6594</b><br><b>8.14%</b> | <b>6454</b><br><b>7.97%</b> | <b>6289</b><br><b>7.76%</b> | <b>6073</b><br><b>7.50%</b> | <b>5788</b><br><b>7.14%</b> | <b>5892</b><br><b>7.27%</b> | <b>5499</b><br><b>6.79%</b> | <b>5543</b><br><b>6.84%</b> | <b>5528</b><br><b>6.82%</b> | <b>5205</b><br><b>6.42%</b> | <b>81015</b><br><b>100%</b>   |
