# Supplementary material for: Case fatality ratios for serious emergency conditions in the Republic of Ireland: a longitudinal investigation of trends over the period 2002–2014 using joinpoint analysis
Source: Springer Nature journal article supplement (doi:10.1186/s12913-018-3260-1), 2018-06-19
Supplement: MOESM5 [file 12913_2018_3260_MOESM5_ESM.pdf]

|                             |                                                                                                                                                                                                                                                                                                                                                                                                                                                                                                                                                                                                                                                                                                                                                                                                                                                                        |
|-----------------------------|------------------------------------------------------------------------------------------------------------------------------------------------------------------------------------------------------------------------------------------------------------------------------------------------------------------------------------------------------------------------------------------------------------------------------------------------------------------------------------------------------------------------------------------------------------------------------------------------------------------------------------------------------------------------------------------------------------------------------------------------------------------------------------------------------------------------------------------------------------------------|
| Title                       | Case fatality ratios for serious emergency conditions in the Republic of Ireland: a longitudinal investigation of trends over the period 2002-2014 using joinpoint analysis                                                                                                                                                                                                                                                                                                                                                                                                                                                                                                                                                                                                                                                                                            |
| Authors                     | Lynch, Brenda;Fitzgerald, Anthony P.;Corcoran, Paul;Healy, Orla;Buckley, Claire M.;Foley, Conor;Browne, John P.                                                                                                                                                                                                                                                                                                                                                                                                                                                                                                                                                                                                                                                                                                                                                        |
| Publication date            | 2018-06-19                                                                                                                                                                                                                                                                                                                                                                                                                                                                                                                                                                                                                                                                                                                                                                                                                                                             |
| Original Citation           | Lynch, B., Fitzgerald, A. P., Corcoran, P., Healy, O., Buckley, C., Foley, C. and Browne, J. (2018) 'Case fatality ratios for serious emergency conditions in the Republic of Ireland: a longitudinal investigation of trends over the period 2002–2014 using joinpoint analysis', BMC Health Services Research, 18(1), 474 (12 pp). doi:10.1186/s12913-018-3260-1                                                                                                                                                                                                                                                                                                                                                                                                                                                                                                     |
| Type of publication         | Article (peer-reviewed)                                                                                                                                                                                                                                                                                                                                                                                                                                                                                                                                                                                                                                                                                                                                                                                                                                                |
| Link to publisher's version | <a href="https://bmchealthservres.biomedcentral.com/articles/10.1186/s12913-018-3260-1">https://bmchealthservres.biomedcentral.com/articles/10.1186/s12913-018-3260-1</a> - <a href="https://doi.org/10.1186/s12913-018-3260-1">10.1186/s12913-018-3260-1</a>                                                                                                                                                                                                                                                                                                                                                                                                                                                                                                                                                                                                          |
| Rights                      | © The Author(s). 2018 Open Access This article is distributed under the terms of the Creative Commons Attribution 4.0 International License ( <a href="http://creativecommons.org/licenses/by/4.0/">http://creativecommons.org/licenses/by/4.0/</a> ), which permits unrestricted use, distribution, and reproduction in any medium, provided you give appropriate credit to the original author(s) and the source, provide a link to the Creative Commons license, and indicate if changes were made. The Creative Commons Public Domain Dedication waiver ( <a href="http://creativecommons.org/publicdomain/zero/1.0/">http://creativecommons.org/publicdomain/zero/1.0/</a> ) applies to the data made available in this article, unless otherwise stated. - <a href="http://creativecommons.org/licenses/by/4.0/">http://creativecommons.org/licenses/by/4.0/</a> |
| Download date               | 2024-05-30 23:43:08                                                                                                                                                                                                                                                                                                                                                                                                                                                                                                                                                                                                                                                                                                                                                                                                                                                    |
| Item downloaded from        | <a href="https://hdl.handle.net/10468/7009">https://hdl.handle.net/10468/7009</a>                                                                                                                                                                                                                                                                                                                                                                                                                                                                                                                                                                                                                                                                                                                                                                                      |

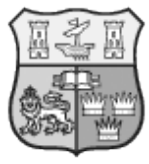

# UCC

**University College Cork, Ireland**  
Coláiste na hOllscoile Corcaigh

**Additional file 5: Table 5** Number (%) of deaths and survivors by emergency conditions, 2002-2014

| Condition                                      |                           | Status        |               | Total          |
|------------------------------------------------|---------------------------|---------------|---------------|----------------|
|                                                |                           | Alive         | Dead          |                |
| <b>Stroke</b>                                  |                           |               |               |                |
| Stroke                                         | Count                     | 52068         | 20483         | 72551          |
|                                                | % within condition        | 71.77%        | 28.23%        | 100.00%        |
| <b>AMI and CA</b>                              |                           |               |               |                |
| Acute Myocardial Infarction and Cardiac Arrest | Count                     | 54395         | 34595         | 88990          |
|                                                | % within condition        | 61.12%        | 38.88%        | 100.00%        |
| <b>Other</b>                                   |                           |               |               |                |
| Acute Heart Failure                            | Count                     | 49763         | 7084          | 56847          |
|                                                | % within condition        | 87.54%        | 12.46%        | 100.00%        |
| Anaphylaxis                                    | Count                     | 428           | 6             | 434            |
|                                                | % within condition        | 98.62%        | 1.38%         | 100.00%        |
| Asphyxiation                                   | Count                     | 360           | 4570          | 4930           |
|                                                | % within condition        | 7.30%         | 92.70%        | 100.00%        |
| Asthma                                         | Count                     | 26822         | 714           | 27536          |
|                                                | % within condition        | 97.41%        | 2.59%         | 100.00%        |
| Falls <75                                      | Count                     | 77591         | 392           | 77983          |
|                                                | % within condition        | 99.50%        | 0.50%         | 100.00%        |
| Fractured Neck of Femur                        | Count                     | 47218         | 1577          | 48795          |
|                                                | % within condition        | 96.77%        | 3.23%         | 100.00%        |
| Meningitis                                     | Count                     | 3424          | 195           | 3619           |
|                                                | % within condition        | 94.61%        | 5.39%         | 100.00%        |
| Pregnancy and Birth Related                    | Count                     | 566           | 25            | 591            |
|                                                | % within condition        | 95.77%        | 4.23%         | 100.00%        |
| Road Traffic Accident                          | Count                     | 23835         | 2000          | 25835          |
|                                                | % within condition        | 92.26%        | 7.74%         | 100.00%        |
| Ruptured Aortic Aneurysm                       | Count                     | 996           | 2934          | 3930           |
|                                                | % within condition        | 25.34%        | 74.66%        | 100.00%        |
| Self-Harm                                      | Count                     | 18849         | 1996          | 20845          |
|                                                | % within condition        | 90.42%        | 9.58%         | 100.00%        |
| Septic Shock                                   | Count                     | 13495         | 970           | 14465          |
|                                                | % within condition        | 93.29%        | 6.71%         | 100.00%        |
| Serious Head Injury                            | Count                     | 41327         | 3474          | 44801          |
|                                                | % within condition        | 92.25%        | 7.75%         | 100.00%        |
| <b>Total</b>                                   | <b>Count</b>              | <b>411137</b> | <b>81015</b>  | <b>492152</b>  |
|                                                | <b>% within condition</b> | <b>83.54%</b> | <b>16.46%</b> | <b>100.00%</b> |
